# Supplementary material for: Integrative Analysis of Differential lncRNA/mRNA Expression Profiling in Helicobacter pylori Infection-Associated Gastric Carcinogenesis
Source: Front Microbiol. 2020 May 8;11:880. doi: 10.3389/fmicb.2020.00880 (PMC7225608; doi:10.3389/fmicb.2020.00880)
Supplement: TABLE S8 — The module eigengenes of modules using WGCNA analysis. [file Table_8.XLSX]

## Sheet: Sheet1
Supplementary Table S8. The module eigengenes of modules using WGCNA analysis.
Blue module		Brown module		Green module		Turquoise module		Yellow module
Gene ID	Gene symbol	Gene ID	Gene symbol	Gene ID	Gene symbol	Gene ID	Gene symbol	Gene ID	Gene symbol
344148	NCKAP5	5645	PRSS2	27076	LYPD3	1540	CYLD	287	ANK2
604	BCL6	51676	ASB2	BGIG9606_67895	BGIG9606_67895	9235	IL32	64600	PLA2G2F
90865	IL33	90427	BMF	158067	AK8	83543	AIF1L	10318	TNIP1
3678	ITGA5	23657	SLC7A11	23175	LPIN1	100913187	APOBEC3A_B	3579	CXCR2
BGIG9606_58592	BGIG9606_58592	440	ASNS	4776	NFATC4	79094	CHAC1	164284	APCDD1L
266977	ADGRF1	5106	PCK2	3638	INSIG1	5971	RELB	51646	YPEL5
10170	DHRS9	BGIG9606_68420	BGIG9606_68420	7098	TLR3	1030	CDKN2B	BGIG9606_67687	BGIG9606_67687
10397	NDRG1	100862671	TMEM265	3157	HMGCS1	5327	PLAT	BGIG9606_46052	BGIG9606_46052
BGIG9606_45047	BGIG9606_45047	6536	SLC6A9	140825	NEURL2	1491	CTH	6698	SPRR1A
7145	TNS1	5723	PSPH	255394	TCP11L2	4327	MMP19	BGIG9606_51662	BGIG9606_51662
BGIG9606_49422	BGIG9606_49422	84803	GPAT3	58476	TP53INP2	BGIG9606_64599	BGIG9606_64599	6274	S100A3
BGIG9606_54367	BGIG9606_54367	26291	FGF21	6307	MSMO1	3576	CXCL8	107984862	LOC107984862
665	BNIP3L	10797	MTHFD2	221416	C6orf223	BGIG9606_63395	BGIG9606_63395	89795	NAV3
BGIG9606_54780	BGIG9606_54780	23046	KIF21B	2525	FUT3	83667	SESN2	54541	DDIT4
285966	TCAF2	59344	ALOXE3	202	CRYBG1	3572	IL6ST	8817	FGF18
1843	DUSP1	4319	MMP10	100526760	ABHD14A-ACY1	BGIG9606_54770	BGIG9606_54770	694	BTG1
154761	LOC154761	833	CARS	BGIG9606_47601	BGIG9606_47601	84904	ARHGEF39	118932	ANKRD22
105376714	LOC105376714	6703	SPRR2D	BGIG9606_51970	BGIG9606_51970	7128	TNFAIP3	51363	CHST15
147040	KCTD11	3885	KRT34	105376292	LOC105376292	BGIG9606_36875	BGIG9606_36875	4316	MMP7
80201	HKDC1	79924	ADM2	105377663	LOC105377663	BGIG9606_54754	BGIG9606_54754	7422	VEGFA
353322	ANKRD37	50615	IL21R			115701	ALPK2	9314	KLF4
727758	ROCK1P1	2887	GRB10			51561	IL23A	284417	TMEM150B
11067	DEPP1	255738	PCSK9			3561	IL2RG	154754	PRSS3P2
7031	TFF1	138429	PIP5KL1			23710	GABARAPL1	54346	UNC93A
401647	GOLGA7B	51175	TUBE1			9075	CLDN2	3624	INHBA
4084	MXD1	83729	INHBE			79315	OR7E91P	122953	JDP2
8941	CDK5R2	26471	NUPR1			4973	OLR1	65249	ZSWIM4
4312	MMP1	3918	LAMC2			8614	STC2	9518	GDF15
4601	MXI1	57198	ATP8B2			120939	TMEM52B	4739	NEDD9
147138	TMC8	5644	PRSS1			643911	CRNDE	3312	HSPA8
100996720	LOC100996720	9586	CREB5			11082	ESM1	BGIG9606_44072	BGIG9606_44072
760	CA2	57761	TRIB3			493869	GPX8	BGIG9606_44538	BGIG9606_44538
901	CCNG2	3604	TNFRSF9			121268	RHEBL1	107984661	LOC107984661
113791	PIK3IP1	9945	GFPT2			3684	ITGAM	80868	HCG4B
8553	BHLHE40	130367	SGPP2			93082	NEURL3	100288175	LOC100288175
10957	PNRC1	6509	SLC1A4			5055	SERPINB2	286059	LOC286059
728310	GOLGA6L7	1842	ECM2			10893	MMP24	100505633	LINC01133
140686	WFDC3	51378	ANGPT4			9283	GPR37L1
768	CA9	8501	SLC43A1			7185	TRAF1
653691	TCAF2P1	11182	SLC2A6			6542	SLC7A2
5210	PFKFB4	101928477	LOC101928477			330	BIRC3
64798	DEPTOR	BGIG9606_49852	BGIG9606_49852			55586	MIOX
84699	CREB3L3	BGIG9606_49853	BGIG9606_49853			3696	ITGB8
5540	NPY4R	111064646	TPM1-AS			2113	ETS1
8497	PPFIA4	103752589	TMEM92-AS1			105374378	LOC105374378
101929613	LOC101929613	102724830	LOC102724830			27128	CYTH4
BGIG9606_51523	BGIG9606_51523	105374286	LOC105374286			55281	TMEM140
100505994	LUCAT1	101928767	LINC02328			167681	PRSS35
285830	HLA-F-AS1	441172	FLJ46906			1543	CYP1A1
731656	LINC01348					4791	NFKB2
105371684	LOC105371684					135112	NCOA7
283875	LINC00514					8605	PLA2G4C
200058	FLJ23867					10019	SH2B3
102724908	LOC102724908					23650	TRIM29
101929947	ITGA6-AS1					442578	STAG3L3
105370526	LOC105370526					BGIG9606_66826	BGIG9606_66826
101927067	LINC01607					BGIG9606_38787	BGIG9606_38787
619351	LINC00589					BGIG9606_51663	BGIG9606_51663
105369301	LOC105369301					BGIG9606_41481	BGIG9606_41481
						BGIG9606_52251	BGIG9606_52251
						BGIG9606_36068	BGIG9606_36068
						107986148	LOC107986148
						107987178	LOC107987178
						101927708	LOC101927708
						101927318	LOC101927318
						84847	LINC00525
						102724467	LOC102724467
						101928233	LINC01671
						339988	LINC002481
						105371393	LOC105371393
